# Supplementary material
Source: publisher figshare collection journal article supplement (https://tandf.figshare.com/articles/dataset/_/7380842)
Supplement: Supplementary file 1 [file 1]

Archive with 2 entries (2 files):
- Appendix 1.pdf
- Appendix 2.pdf
