# Supplementary material
Source: publisher figshare collection journal article supplement (https://tandf.figshare.com/articles/dataset/_/7380842)
Supplement: Supplementary file 1 [file 1 › Appendix 1.pdf]

| Objects and notes |                                                    |                                                                                |                                                   |
|-------------------|----------------------------------------------------|--------------------------------------------------------------------------------|---------------------------------------------------|
| Type code         | Type description                                   | Description                                                                    | Comments / Notes                                  |
|                   |                                                    |                                                                                |                                                   |
| 1                 | Substructure                                       |                                                                                |                                                   |
| 10                | Terrain                                            |                                                                                |                                                   |
| 12                | Foundations                                        |                                                                                |                                                   |
| 121001            | 250 mm Lightweight blocks                          |                                                                                |                                                   |
| 121002            | 250 mm Trench footing                              |                                                                                |                                                   |
| 121003            | 150 mm Lightweight blocks                          | Bearing                                                                        | X                                                 |
| 121004            | 330 mm Trench footing                              | Bearing                                                                        | X                                                 |
| 121006            | 600 mm Trench footing                              | Bearing                                                                        | X                                                 |
| 121007            | 400 mm Trench footing                              | Bearing                                                                        | X                                                 |
| 121008            | 550 mm Trench footing                              | Bearing                                                                        | X                                                 |
| 121009            | 120 mm Lightweight blocks                          | Bearing                                                                        | X                                                 |
| 122001            | 1100 x 1100 mm Pad footing                         | Bearing                                                                        | X                                                 |
| 122002            | 1100 x 1100 mm Pad footing                         | Bearing                                                                        | X                                                 |
| 122003            | 2000 x 2000 mm Pad footing                         | Bearing                                                                        | X                                                 |
| 122004            | 2000 x 100 mm Pad footing                          | Bearing                                                                        | X                                                 |
| 122005            | 800 x 600 mm Pad footing                           | Bearing                                                                        | X                                                 |
| 13                | Floor beds                                         |                                                                                |                                                   |
| 131001            | 305 mm Ground floor                                | 275 mm hard insulation, 120 mm reinforced screed                               | X                                                 |
| 131002            | 305 mm Ground floor                                | 275 mm gravel, 120 mm reinforced screed                                        | X                                                 |
| 2                 | Primary building elements                          |                                                                                |                                                   |
| 20                | Terrain                                            |                                                                                |                                                   |
| 21                | Exterior walls                                     |                                                                                |                                                   |
| 211001            | 200 mm Sandwich panel sheathing                    | Bearing                                                                        | CA X 211001 Work description 211001 Ruski element |
| 211002            | 30 mm steel trapez                                 |                                                                                | X                                                 |
| 211003            | 226 mm Lightweight exterior wall                   | 2 x gypsum, 150 mm insulation, 25 mm battens, 25 mm woodchip ceiling panels    | X                                                 |
| 211004            | 227 mm Lightweight exterior wall                   | 2 x gypsum, 150 mm insulation, 25 mm battens, 2 x gypsum                       | X                                                 |
| 211005            | 216 mm Lightweight exterior wall                   | 2 x gypsum, 200 mm insulation - battens +35 mm wood chip panels                |                                                   |
| 22                | Interior walls                                     |                                                                                |                                                   |
| 221001            | 600 mm Precast concrete element                    |                                                                                |                                                   |
| 221002            | 600 mm Precast concrete element                    |                                                                                |                                                   |
| 221003            | 120 mm Precast concrete element                    |                                                                                |                                                   |
| 221004            | 100 mm Multi block                                 | done acc. To suppliers specifications, Plaster on free surfaces sides          |                                                   |
| 224001            | 145 mm Interior frame structured walls             | 85 mm steel studs, 95 mm insulation, 2 x gypsum                                |                                                   |
| 224002            | 120 mm Interior frame structured walls             | 70 mm steel studs, 95 mm insulation, 2 x gypsum                                | 52 dB E1 60 A2-s1,d0 CA X X                       |
| 224003            | 85 mm Interior frame structured walls              | 70 mm steel studs, 70 mm insulation, 2 x gypsum                                | 44 dB E1 60 A2-s1,d0 X                            |
| 224004            | 100 mm Wooden stud w. glass                        |                                                                                | X                                                 |
| 224005            | 145 mm Interior frame structured wall              | 85 mm wood studs, 95 mm insulation, 2 x gypsum                                 | X                                                 |
| 224006            | 145 mm Interior frame structured wall              | 120 mm steel studs, 2 x gypsum                                                 | X                                                 |
| 224007            | 145 mm Interior frame structured wall              | 70 mm steel studs, 2 x gypsum                                                  | CA X                                              |
| 23                | Slab                                               |                                                                                |                                                   |
| 231001            | 120 mm Precast slabs                               | Bearing                                                                        | X                                                 |
| 231002            | 120 mm Precast slabs                               | Bearing                                                                        | X                                                 |
| 233001            | 317 mm Frame structured slabs                      | 5 mm linoleum, 195 mm structural timber, 19 mm battens, 25 mm wood chip panels | X                                                 |
| 233002            | 317 mm Frame structured slabs                      | 22 mm plywood, 245 mm structural timber, 25 mm battens, 25 mm wood chip panels | X                                                 |
| 24                | Stairs and ramps                                   |                                                                                |                                                   |
| 241001            | Prefab. stairs W. woodsteps                        | steel stair, 25 mm wood landing                                                | X                                                 |
| 241002            | Prefab. stairs W. woodsteps                        | steel stair                                                                    | X                                                 |
| 244001            | Prefab. stairs W. woodsteps                        | steel stair steps, 25 mm wood landing                                          | X                                                 |
| 244002            | Precast ramp                                       |                                                                                | X                                                 |
| 25                | Load-bearing beams and columns                     |                                                                                |                                                   |
| 253001            | HE240B Steel beam                                  | Bearing                                                                        | X                                                 |
| 253002            | HE240 Steel beam                                   | Bearing                                                                        | X                                                 |
| 253003            | Steel beam                                         | Bearing                                                                        | X                                                 |
| 253004            | IPES150 Steel beam                                 | Bearing                                                                        | X                                                 |
| 257001            | HE240B Steel column                                | Bearing                                                                        | X                                                 |
| 257002            | HE220 Steel column                                 | Bearing                                                                        | X                                                 |
| 257003            | HE340B Steel column                                | Bearing                                                                        | X                                                 |
| 257004            | IPES140 Steel column                               | Bearing                                                                        | X                                                 |
| 257005            | IPES127 mm circular steel pipe                     | Bearing                                                                        | X                                                 |
| 26                | Balconys and exterior hallways                     |                                                                                |                                                   |
| 27                | Roofs                                              |                                                                                |                                                   |
| 271001            | Steel trusses                                      | Bearing                                                                        | X                                                 |
| 271002            | Ceak sheet w. roof felt 30 mm                      | Bearing                                                                        | X                                                 |
| 272001            | 360 mm roof unit                                   | Bearing                                                                        | X                                                 |
| 273001            | 360 mm warm roof                                   | Bearing                                                                        | X                                                 |
| 28                | Other primary building elements                    |                                                                                |                                                   |
| 3                 | Complementary building elements                    |                                                                                |                                                   |
| 30                | Secondary elements, terrain                        |                                                                                |                                                   |
| 31                | Secondary elements to external walls               |                                                                                |                                                   |
| 311001            | 610x2100 mm ext. Door                              | wood/alu                                                                       |                                                   |
| 311002            | 1600x1600 mm ext. Door                             |                                                                                | GA X X                                            |
| 312001            | 2000x1200 mm ext. Window                           | fixed frame, alu                                                               | X                                                 |
| 312002            | 2000x1200 mm ext. Window                           | top-hinged window, alu                                                         | X                                                 |
| 312003            | 2000x1200 mm ext. Window                           |                                                                                | X                                                 |
| 316001            | 3600x2000 mm Sectional garage door                 |                                                                                | X                                                 |
| 316002            | 3600x2000 mm Sectional garage door                 |                                                                                | X                                                 |
| 316003            | 3600x2416 mm Sectional garage door                 |                                                                                | X                                                 |
| 316004            | 7300x6000 mm Sectional garage door                 |                                                                                | X                                                 |
| 316005            | 1600x4340 mm Sliding garage door                   |                                                                                | X                                                 |
| 32                | Interior, secondary elements                       |                                                                                |                                                   |
| 321001            | Int. door 1921 M                                   | E12 60-C A2-s1,d0 CA X X                                                       |                                                   |
| 321002            | Int. door 1921 M                                   | E12 60-C                                                                       | X                                                 |
| 321003            | Int. door 1021 M                                   | E12 60-C                                                                       | X                                                 |
| 321004            | Int. door 8x21 M                                   | E12 30-C CA X X                                                                |                                                   |
| 321005            | Int. door 8x21 M                                   | E12 30                                                                         | X                                                 |
| 321006            | Int. door 8x21 M                                   |                                                                                |                                                   |
| 321007            | Int. door 8x21 M                                   | CA X X                                                                         |                                                   |
| 321008            | 2M4 Steel double door                              | E12 60-C A2-s1,d0 X                                                            |                                                   |
| 321009            | 2EM Steel sliding door                             | E12 60-C A2-s1,d0 X                                                            |                                                   |
| 321010            | 1400x100 mm Sliding garage door                    | E12 60-C A2-s1,d0 X                                                            |                                                   |
| 321011            | 1504 Glass double door                             | E1 60-C                                                                        | X                                                 |
| 321012            | 8x21 M Wooden door w. glass                        |                                                                                | GA X X                                            |
| 321013            | 8x21 M w. glass                                    |                                                                                | X                                                 |
| 321014            | Double door w. glass                               | Fixed frame                                                                    | X                                                 |
| 322001            | 200 x 1500 mm window                               | Fixed frame                                                                    | X                                                 |
| 322002            | 400 x 2100 mm window                               | Fixed frame                                                                    | X                                                 |
| 33                | Stairs, complementary                              |                                                                                |                                                   |
| 34                | Stairs and ramps, secondary                        |                                                                                |                                                   |
| 35                | Ceiling, complementary                             |                                                                                |                                                   |
| 353001            | 60 mm ceiling                                      |                                                                                |                                                   |
| 36                | Balconies, secondary                               | 25 mm battens, 25 mm wood chip panels                                          | X                                                 |
| 37                | Roofs, secondary                                   |                                                                                |                                                   |
| 372001            | 2500x1000 mm Skylight                              |                                                                                | X                                                 |
| 38                | Other secondary building elements                  |                                                                                |                                                   |
| 4                 | Coverings, cladding and finishing                  |                                                                                |                                                   |
| 40                | Terrain, coverings                                 |                                                                                |                                                   |
| 41                | Exterior wall finishes                             |                                                                                |                                                   |
| 413001            | 50 mm Steel covering mounted                       | 25 mm battens, 25 mm steel trapez sheets                                       | CA X                                              |
| 42                | Interior wall finishes                             |                                                                                |                                                   |
| 423001            | 40 mm Fireprotection columns                       | 40 mm Condit 150                                                               | Bearing X                                         |
| 43                | Suspended floors & finishes                        |                                                                                |                                                   |
| 433001            | Carpet                                             |                                                                                | CA X                                              |
| 44                | Stairs and ramps, finishes                         |                                                                                |                                                   |
| 45                | Ceiling, finishes                                  |                                                                                |                                                   |
| 453001            | 85 mm Fireprotection Steel beams                   | 40 mm Condit 150, 25 mm wood chip panels                                       | Bearing X                                         |
| 46                | Balconies, finishes                                |                                                                                |                                                   |
| 47                | Roof, finishes                                     |                                                                                |                                                   |
| 48                | Surface building, other                            |                                                                                |                                                   |
| 5                 | Plumbing - and HVAC control systems                |                                                                                |                                                   |
| 50                | Plumbing installations, terrain                    |                                                                                |                                                   |
| 51                | Logistics                                          |                                                                                |                                                   |
| 52                | Wastewater and Sanitation                          |                                                                                |                                                   |
| 53                | Water (cold / hot water, treated water)            |                                                                                |                                                   |
| 54                | Air Type (Gas, compressed air, Vacuum, Steam)      |                                                                                |                                                   |
| 55                | Cooling                                            |                                                                                |                                                   |
| 56                | Heating                                            |                                                                                |                                                   |
| 57                | Ventilation                                        |                                                                                |                                                   |
| 58                | Sprinkling                                         |                                                                                |                                                   |
| 59                | Multi disciplin components                         |                                                                                |                                                   |
| 6                 | Electrical and mechanical installations            |                                                                                |                                                   |
| 60                | Terrain                                            |                                                                                |                                                   |
| 61                | Routing                                            |                                                                                |                                                   |
| 62                | High voltage                                       |                                                                                |                                                   |
| 63                | Low voltage                                        |                                                                                |                                                   |
| 64                | Communication and information                      |                                                                                |                                                   |
| 65                | Security                                           |                                                                                |                                                   |
| 66                | Building automation                                |                                                                                |                                                   |
| 67                | Protection                                         |                                                                                |                                                   |
| 68                | Passenger and material transportation              |                                                                                |                                                   |
| 7                 | Furniture and equipment                            |                                                                                |                                                   |
| 70                | Furniture, terrain                                 |                                                                                |                                                   |
| 71                | Furniture, built-in                                |                                                                                |                                                   |
| 72                | Furniture, movable                                 |                                                                                |                                                   |
| 73                | Fixtures, technical, IT and audio-visual equipment |                                                                                |                                                   |
| 8                 | Planting and external ground finishes              |                                                                                |                                                   |
| 80                | Coatings and fixings                               |                                                                                |                                                   |
| 81                | Planting                                           |                                                                                |                                                   |

| Object information and -specifikations |         |                     |         |             |                 |            |                  |                |  |
|----------------------------------------|---------|---------------------|---------|-------------|-----------------|------------|------------------|----------------|--|
| Sound classification                   | U-value | Fire classification | Status  | Subcontract | Existing contr. | New const. | Work description | Specifications |  |
|                                        |         |                     |         |             |                 |            |                  |                |  |
|                                        |         |                     |         |             |                 | X          |                  |                |  |
|                                        |         |                     | Bearing |             |                 | X          |                  |                |  |
|                                        |         |                     | Bearing |             |                 | X          |                  |                |  |
|                                        |         |                     | Bearing |             |                 | X          |                  |                |  |
|                                        |         |                     | Bearing |             |                 | X          |                  |                |  |
|                                        |         |                     | Bearing |             |                 | X          |                  |                |  |
|                                        |         |                     | Bearing |             |                 | X          |                  |                |  |
|                                        |         |                     | Bearing |             |                 | X          |                  |                |  |
|                                        |         |                     | Bearing |             |                 | X          |                  |                |  |
|                                        |         |                     | Bearing |             |                 | X          |                  |                |  |
|                                        |         |                     | Bearing |             |                 | X          |                  |                |  |
|                                        |         |                     | Bearing |             |                 | X          |                  |                |  |
|                                        |         |                     | Bearing |             |                 | X          |                  |                |  |
|                                        |         |                     | Bearing |             |                 | X          |                  |                |  |
|                                        |         |                     | Bearing |             |                 | X          |                  |                |  |
|                                        |         |                     | Bearing |             |                 | X          |                  |                |  |
|                                        |         |                     | Bearing |             |                 | X          |                  |                |  |
|                                        |         |                     | Bearing |             |                 | X          |                  |                |  |
|                                        |         |                     | Bearing |             |                 | X          |                  |                |  |
|                                        |         |                     | Bearing |             |                 | X          |                  |                |  |
|                                        |         |                     | Bearing |             |                 | X          |                  |                |  |
|                                        |         |                     | Bearing |             |                 | X          |                  |                |  |
|                                        |         |                     | Bearing |             |                 | X          |                  |                |  |
|                                        |         |                     | Bearing |             |                 | X          |                  |                |  |
|                                        |         |                     | Bearing |             |                 | X          |                  |                |  |
|                                        |         |                     | Bearing |             |                 | X          |                  |                |  |
|                                        |         |                     | Bearing |             |                 | X          |                  |                |  |
|                                        |         |                     | Bearing |             |                 | X          |                  |                |  |
|                                        |         |                     | Bearing |             |                 | X          |                  |                |  |
|                                        |         |                     | Bearing |             |                 | X          |                  |                |  |
|                                        |         |                     | Bearing |             |                 | X          |                  |                |  |
|                                        |         |                     | Bearing |             |                 | X          |                  |                |  |
|                                        |         |                     | Bearing |             |                 | X          |                  |                |  |
|                                        |         |                     | Bearing |             |                 | X          |                  |                |  |
|                                        |         |                     | Bearing |             |                 | X          |                  |                |  |
|                                        |         |                     | Bearing |             |                 | X          |                  |                |  |
|                                        |         |                     | Bearing |             |                 | X          |                  |                |  |
|                                        |         |                     | Bearing |             |                 | X          |                  |                |  |
|                                        |         |                     | Bearing |             |                 | X          |                  |                |  |
|                                        |         |                     | Bearing |             |                 | X          |                  |                |  |
|                                        |         |                     | Bearing |             |                 | X          |                  |                |  |
|                                        |         |                     | Bearing |             |                 | X          |                  |                |  |
|                                        |         |                     | Bearing |             |                 | X          |                  |                |  |
|                                        |         |                     | Bearing |             |                 | X          |                  |                |  |
|                                        |         |                     | Bearing |             |                 | X          |                  |                |  |
|                                        |         |                     | Bearing |             |                 | X          |                  |                |  |
|                                        |         |                     | Bearing |             |                 | X          |                  |                |  |
|                                        |         |                     | Bearing |             |                 | X          |                  |                |  |
|                                        |         |                     | Bearing |             |                 | X          |                  |                |  |
|                                        |         |                     | Bearing |             |                 | X          |                  |                |  |
|                                        |         |                     | Bearing |             |                 | X          |                  |                |  |
|                                        |         |                     | Bearing |             |                 | X          |                  |                |  |
|                                        |         |                     | Bearing |             |                 | X          |                  |                |  |
|                                        |         |                     | Bearing |             |                 | X          |                  |                |  |
|                                        |         |                     | B       |             |                 |            |                  |                |  |
